# Supplementary material for: GC-TOF/MS-based metabolomics analysis to investigate the changes driven by N-Acetylcysteine in the plant-pathogen Xanthomonas citri subsp. citri
Source: Sci Rep. 2021 Jul 30;11:15558. doi: 10.1038/s41598-021-95113-4 (PMC8324833; doi:10.1038/s41598-021-95113-4)
Supplement: Supplementary file 1 — Supplementary Table 1. [file 41598_2021_95113_MOESM1_ESM.xlsx]

## Sheet: Supplementary Table S1
GC-TOF/MS-based metabolomics analysis to investigate the antimicrobial activity of N-Acetylcysteine in the plant-pathogen Xanthomonas citri subsp. citri
Simone Cristina Picchi, Mariana de Souza e Silva, Luiz Leonardo Saldanha, Henrique Ferreira Marco Aurélio Takita, Camila Caldana and Alessandra Alves de Souza
Effect of NAC in Xanthomonas citri primary metabolism pathways identified by a targeted analysis.
Treatment	Before Treatment						Control																																			NAC
Time point	0h						1h						2h						4h					6h						12h						24h						1h						2h
Replicate	1	2	3	4	5	6	1	2	3	4	5	6	1	2	3	4	5	6	1	2	3	4	5	1	2	3	4	5	6	1	2	3	4	5	6	1	2	3	4	5	6	1	2	3	4	5	6	1	2
Lactate	20.7396	21.2691	21.7773	20.8136	21.3774	20.6346	20.8432	21.1768	20.9013	21.1723	21.0998	20.9774	21.0618	20.7572	21.3045	20.7573	21.3865	21.5097	20.8218	20.9567	20.7448	21.0584	20.8976	20.8345	20.3954	20.6114	20.4204	20.92	20.7958	20.5123	20.3568	20.1051	20.1837	20.1581	20.3765	20.0185	19.934	20.0832	20.2331	20.1813	20.7327	20.1062	19.7329	20.0272	20.0164	19.7115	20.6029	20.5113	20.6056
Similar to Glycolate	15.2615	16.2664	16.0952	15.0651	15.3735	14.9528	14.5721	15.1751	16.0407	15.6711	14.5654	15.653	15.6614	14.6393	14.8129	14.476	14.3476	15.8806	14.7447	14.5635	14.4717	15.3747	14.9485	13.9131	14.3093	14.2218	14.3311	14.5312	14.7388	14.7118	14.7421	15.1225	14.755	14.1083	14.8547	14.5951	16.0584	15.7655	14.844	15.4116	15.6322	14.7936	14.9554	14.0599	14.2315	14.319	16.4806	14.6354	15.7918
Alanine	22.1153	22.1	21.6297	22.4695	22.2197	21.477	22.1497	22.4582	22.0052	22.2338	22.2936	22.1184	21.9625	22.3298	22.0854	22.045	22.2487	22.5982	21.9869	22.191	22.1557	22.4222	22.3683	22.2447	22.187	22.5258	22.1971	22.4161	22.1804	21.7473	22.0168	22.0479	21.9125	22.3174	22.4766	21.1719	21.4175	21.4145	21.1914	21.8941	21.5622	21.2702	21.4639	21.6114	21.6143	21.2592	20.7923	21.8468	21.7763
Similar to Acetoacetate	16.9636	16.8694	16.2788	17.0256	16.83	16.1805	16.8701	17.024	16.7296	16.7921	16.8426	16.755	16.8335	17.0287	17.0209	16.9698	16.9209	17.0177	17.065	17.2862	17.0509	17.1746	17.1267	17.5291	17.3447	17.614	17.4714	17.3135	17.2246	17.7531	17.9447	18.0721	17.9289	17.7484	17.7214	18.1087	18.0531	17.9787	18.1704	17.8018	18.2157	16.2275	16.162	16.1978	16.2637	16.1889	15.7323	16.5455	16.4233
Valine	21.9251	21.9159	21.3595	22.0967	21.9196	21.1818	21.9178	22.1273	21.7748	21.8658	21.8925	21.7033	21.8074	22.0496	22.0408	22.0144	21.9427	22.0622	22.0716	22.3235	22.109	22.1912	22.126	22.5704	22.409	22.7143	22.5505	22.4197	22.2604	22.8475	23.0508	23.5638	23.4404	23.3185	23.3122	23.5393	23.6087	23.5493	23.5992	23.3278	23.6426	21.2095	21.2493	21.2863	21.3617	21.1541	20.8287	21.5713	21.4914
Glycerol	21.3534	22.1219	21.8377	22.3094	22.6891	21.1399	21.4447	22.2443	21.839	21.5533	21.5132	21.4891	21.2713	22.0951	22.118	22.0153	21.4889	21.5441	20.9868	22.0395	21.3756	21.3799	21.3554	20.083	20.7667	20.8572	19.5801	20.5078	20.2835	18.4658	16.879	16.4901	16.4105	15.8015	16.4595	15.7357	16.5452	15.8814	16.5545	15.7454	16.4168	21.4147	20.9402	21.4508	21.5138	21.433	21.1729	21.031	21.5704
Leucine	23.5379	23.3921	22.6204	24.2192	23.8909	22.3433	23.2822	23.6564	23.0954	23.1151	23.2687	22.9758	23.2477	23.4477	23.6229	23.5095	23.1654	23.4208	23.35	23.6717	23.2896	23.3737	23.4638	23.6437	24.147	24.1087	23.6651	23.7411	23.2759	23.435	24.2357	23.991	23.9319	23.7539	23.6329	22.7803	23.7294	23.2449	23.4968	23.1221	23.5267	22.5585	22.6631	22.6514	22.7286	22.5114	21.9761	23.0471	22.7491
Isoleucine	21.7672	21.8315	21.1417	21.9974	21.8469	20.9937	21.598	21.9886	21.558	21.6174	21.7332	21.4826	21.5877	21.8629	22.0151	21.9204	21.6549	21.8049	21.8053	22.1616	21.8856	21.8628	21.944	22.12	22.0807	22.41	22.148	21.9994	21.9135	22.071	22.5001	22.7744	23.1135	22.881	22.8502	21.7832	22.5887	22.2698	22.313	22.5584	22.3165	20.9308	21.0556	21.0832	21.1639	21.0637	20.5868	21.2803	21.2957
Glycine	19.3756	19.0967	18.3872	19.4393	19.6613	18.0641	19.4258	19.3442	18.8939	19.0923	19.312	19.2156	19.043	19.5399	19.3834	19.4542	19.4365	19.7479	19.5659	19.515	19.6741	19.8673	19.7394	20.2874	19.9165	20.2198	20.0646	20.1406	19.981	21.696	20.9588	21.8496	21.6518	21.673	22.2166	23.6659	22.7648	23.1034	23.0755	23.1417	22.3756	18.2746	18.6934	18.6189	18.6353	18.2379	17.5365	19.2209	18.6629
Orthophosphate	22.339	21.4067	19.2667	21.9124	23.7547	19.1474	21.4443	21.3381	19.9277	21.4214	21.5798	22.4364	20.5929	22.8009	21.7446	22.8563	21.6766	21.464	21.2655	21.819	22.1376	22.3981	22.4407	22.0384	23.2605	22.6975	23.5813	22.67	22.3724	24.2347	20.7274	21.4809	22.0673	21.413	21.1715	24.4511	21.3244	21.121	19.6558	20.9988	20.1386	20.2443	20.9904	22.2093	22.1683	19.5866	18.7127	22.1101	21.0301
Proline	20.1229	19.8067	19.3786	20.332	20.2701	19.0376	20.0672	20.2705	19.8331	19.8386	19.9282	19.801	19.8285	20.1974	20.1392	20.1509	19.9879	20.3627	20.1946	20.3864	20.1946	20.3008	20.2376	20.722	20.3931	20.7205	20.5538	20.4093	20.321	21.8473	21.6682	21.9946	21.8972	21.7114	22.0561	20.879	21.7573	21.0017	20.566	22.5148	21.3691	19.1006	19.3906	19.4309	19.4342	19.1398	18.5336	19.8113	19.4015
Glycerate	13.8808	13.9886	13.4965	13.7458	14.1502	13.4323	12.5854	13.1694	13.1446	12.4886	13.0928	13.1294	12.3904	12.6951	12.553	12.5399	12.5321	13.0986	12.2105	12.534	12.5427	12.1692	12.3569	11.9249	12.2033	12.2902	12.3958	NA	NA	13.1503	13.4692	13.4881	13.4418	13.3352	13.1862	NA	NA	NA	NA	NA	NA	13.6861	12.6461	12.727	12.8913	12.654	12.1093	12.3754	12.5854
Benzoate	16.3203	16.8052	16.7588	15.8367	16.1195	16.8177	16.2302	16.264	16.419	16.5917	16.3801	16.5674	16.3831	16.2864	16.2212	16.5572	16.7663	16.4857	15.8722	16.5348	16.4255	16.4236	16.2977	16.2614	16.0488	15.6279	16.2558	16.3913	16.5197	16.2015	15.6597	15.5564	15.5808	15.5588	15.5688	15.2322	15.4624	15.8017	15.512	15.1507	15.9065	16.2863	15.7041	15.687	15.7664	16.14	17.1549	15.4802	16.4387
Similar to Hydroxypyruvate	15.3073	14.9245	14.4842	15.1397	15.4975	14.0881	14.856	14.9582	14.6252	14.565	14.9415	14.9701	14.6546	15.0795	14.9633	15.0297	14.8548	15.0914	14.5535	14.68	14.8244	14.8378	14.8332	14.6837	14.4837	14.7764	14.4497	14.6838	14.5848	13.6828	13.2896	13.3003	13.1058	13.6094	13.4211	13.3045	12.665	12.4178	12.9114	12.7397	12.8986	14.5923	14.9099	14.7909	14.8034	14.3512	14.013	15.2477	14.8211
Serine	18.6444	18.2133	17.6336	18.4227	18.7935	17.3051	18.211	18.2952	17.8693	17.9597	18.2497	18.3423	17.986	18.4585	18.2482	18.4217	18.2843	18.5416	17.828	17.9873	18.0988	18.2517	18.2076	17.9249	17.8478	17.9919	17.7661	18.1003	17.9063	16.7819	16.4833	16.4635	16.3177	16.8944	16.6285	16.4498	15.7089	15.7676	16.0683	15.9059	15.7364	17.3866	17.9008	17.8734	17.9312	17.4378	16.6761	18.2951	17.868
Succinate	12.6443	13.7342	12.8503	13.4317	13.2551	12.3671	11.3101	11.7487	12.1328	11.6527	11.9844	11.5334	11.2089	11.2655	10.9782	11.2931	10.8891	11.7234	12.2459	11.016	11.1817	11.5079	10.7439	10.1049	10.8054	10.6252	11.0557	10.5773	11.3594	11.0652	10.3023	10.7529	10.6017	10.0706	10.3422	11.2733	10.9654	11.4541	11.3786	11.118	11.0689	11.1	11.5294	11.7159	11.5809	11.926	12.6619	9.99079	12.1003
Threonine	17.6446	17.2248	16.6757	17.4902	17.6067	16.35	17.1924	17.4762	17.1259	16.9412	17.2403	17.175	17.1384	17.5709	17.4819	17.4807	17.289	17.4083	17.4484	17.5258	17.3657	17.4591	17.5149	17.7511	17.5767	17.867	17.5967	17.6351	17.6189	17.9367	17.7296	18.0831	17.9421	17.9323	17.9815	18.5329	18.1262	18.2691	18.1921	18.6429	17.9161	16.4949	16.935	16.8544	16.9044	16.6996	16.0805	17.1933	17.0104
Nicotinate	14.0061	13.5273	13.3813	13.9844	13.9698	12.8887	13.6252	14.1748	13.7591	13.5813	13.5725	13.7815	13.5972	14.1731	14.0592	13.8283	13.4863	13.873	13.6563	14.1492	13.6421	13.79	13.7735	13.5558	13.9234	14.0987	13.7973	13.5778	13.6973	13.5954	13.9196	14.2094	14.181	13.9349	14.0082	14.0667	14.1038	14.0366	14.0929	13.9364	13.9081	13.086	13.2877	13.3611	13.1262	13.4022	12.7942	13.3578	13.381
Uracil	16.3388	16.5184	16.237	16.2524	16.0428	16.3654	16.247	16.3364	16.3638	16.3954	16.3134	16.3867	16.2202	16.328	16.4814	16.294	16.2931	16.0571	16.344	16.5133	16.3664	16.1476	16.325	16.2838	16.016	15.9992	16.0471	15.9378	16.2745	17.3093	17.9247	17.641	17.6485	17.5478	17.451	18.3084	19.2074	19.1946	18.9375	18.9565	19.1891	15.9594	15.9349	15.8188	15.7827	16.1108	15.9533	15.8395	16.045
trans-4-Hydroxyproline	13.253	13.0703	12.7668	12.9164	12.9538	13.1415	13.4475	13.2216	13.005	13.4588	13.3178	13.2085	13.1411	13.4122	13.3382	13.4475	13.1496	13.5155	14.5593	14.092	14.2085	14.1859	14.2792	15.5576	15.0144	15.3471	15.1917	15.0594	15.2699	18.5867	17.9751	18.6705	18.4014	18.0424	18.3478	20.5727	19.4124	20.1901	19.9924	20.3674	19.5749	12.663	12.7236	12.5351	12.5974	12.5144	12.4206	13.3459	13.1201
4-Aminobutanoate	16.1194	15.6408	15.1543	16.0446	16.1127	14.822	15.6664	16.0408	17.0543	15.5594	15.6721	15.6235	15.4514	16.1008	16.5238	16.0025	15.6448	16.052	15.7439	15.8578	15.613	15.848	16.6217	15.8892	15.8265	16.1175	15.5936	15.732	15.7605	15.9665	15.7781	16.1568	15.9297	15.8713	16.0154	17.0589	16.2823	16.5469	16.5369	16.611	16.6542	14.9025	15.4439	15.6761	15.2599	15.1714	14.5267	15.6506	15.3184
Aspartate	16.5674	15.5536	13.9256	15.5883	17.3147	12.9132	15.33	15.3295	13.8554	15.1233	15.6306	16.0423	14.4461	16.5822	15.5696	16.5242	15.5839	15.0603	14.9355	15.3305	15.9893	15.848	15.516	15.6182	16.1674	15.8416	16.6911	15.9326	15.6638	17.25	14.3039	14.8455	14.964	14.5019	14.5066	17.05	14.7955	14.3709	13.8309	15.2492	14.2124	13.0621	14.415	16.2992	15.9906	13.1259	12.5149	16.3391	15.0325
Methionine	18.3371	17.992	17.3913	18.1129	18.061	17.2867	17.8819	18.2061	17.8767	17.795	17.8707	17.9006	17.8722	18.1622	18.2451	18.24	17.8737	18.117	18.2614	18.3347	18.0835	18.1187	18.2803	18.4173	18.2953	18.4868	18.3657	18.1953	18.1992	18.6021	18.8399	19.0227	18.9415	18.6856	18.6954	19.2	19.0904	19.2658	19.1911	19.009	18.9183	16.8934	17.274	17.2939	17.3566	17.0415	16.4826	17.4271	17.4786
Cysteine	10.0358	9.65078	NA	9.49497	10.195	NA	NA	9.82741	10.7731	11.8767	11.2147	10.588	9.89041	10.6071	9.39429	NA	11.8656	10.2832	9.44555	10.0236	10.8035	11.0279	10.7379	9.89695	10.6128	10.3291	10.501	11.8743	10.8328	10.3197	11.1475	11.1458	10.6281	11.7284	11.2548	12.3082	12.6884	13.7483	13.1218	13.6156	13.2682	15.1638	14.8687	14.6572	15.1122	16.0871	15.9834	13.5746	15.823
Arginine	18.3222	15.6127	13.5409	16.7571	18.26	14.295	16.0099	16.5001	14.9389	16.6466	17.114	17.7237	15.9406	17.651	16.973	17.6047	17.6493	16.9026	17.0104	17.1087	17.6689	17.531	17.8416	17.5454	18.0947	17.6559	18.2315	18.1721	17.9704	18.6717	15.5224	16.8591	16.6844	17.068	16.308	18.4391	16.9186	16.4212	16.0509	15.9675	16.343	13.5663	16.6393	16.9927	17.1334	14.738	13.1478	17.0483	15.437
C5H10O5 [Xylose|Arabinose|Lyxose]	16.5265	NA	16.0423	16.3303	16.0881	16.33	16.3878	16.4302	16.2595	16.4806	16.4479	16.537	16.4708	16.3533	16.5198	16.413	16.517	16.4194	17.6391	16.9167	17.0605	16.8451	16.8984	NA	16.8566	16.7309	17.6184	16.7802	17.3888	NA	18.4439	NA	17.8795	NA	NA	17.8824	NA	NA	NA	17.125	17.9315	15.9855	16.133	15.7465	15.8284	15.942	15.6141	16.0213	NA
5-Oxoproline	19.6058	18.9956	18.404	19.321	19.747	17.9355	19.0945	19.2766	18.8002	18.8795	18.8182	18.9596	18.9012	19.5093	19.1273	19.321	18.6906	19.2958	19.0828	19.0186	18.9296	19.0671	19.1768	19.2681	19.2216	19.7163	19.2079	19.0544	19.0026	19.8317	19.1834	19.727	19.5576	19.4145	19.5019	20.9186	19.9115	20.1666	19.7852	20.6	19.5287	17.9546	18.346	18.4524	18.3866	17.8513	17.2271	18.7717	18.4432
Glutamate	16.7103	15.3456	13.6741	15.5187	17.0674	13.1965	15.8322	15.7049	14.7113	14.9557	15.2423	15.5733	14.9208	16.4699	15.2962	15.8273	15.3913	15.5589	15.1962	15.1453	15.7097	15.9654	15.5343	16.0419	16.1361	16.2643	16.4758	16.1082	15.4724	17.2737	15.276	15.8694	15.6761	15.6733	15.8256	17.939	16.0027	16.0261	15.1737	17.0296	15.5514	13.5124	14.6258	15.7385	15.6463	13.1304	11.8278	16.2136	15.0021
Phenylalanine	20.6566	20.4095	19.7874	20.7734	20.6606	19.6083	20.1771	20.6491	20.2542	20.1467	20.2069	20.2844	20.219	20.521	20.6496	20.6462	20.223	20.472	20.3618	20.6607	20.36	20.3244	20.6174	20.4868	20.5737	21.0256	20.5524	20.4188	20.4161	20.4337	20.7273	21.0029	21.0581	21.5178	21.3979	20.646	21.1337	21.2876	20.6398	21.3721	20.7819	19.4492	19.8586	19.8135	19.8471	19.7703	19.1319	19.9667	19.9675
Asparagine	16.0469	15.0519	14.2222	15.4961	16.2038	13.7302	15.209	15.3864	14.6348	14.9373	15.3868	15.6666	14.7096	15.8417	15.4055	15.5982	15.7463	16.0756	14.8149	15.1764	15.483	15.8258	15.7381	14.963	15.2697	15.3704	14.9556	15.6035	15.2049	13.9856	13.3093	13.3707	13.226	14.2192	13.8676	13.5515	12.559	12.8792	12.502	13.0024	12.5732	14.0901	14.9518	14.8209	14.818	14.2225	13.0775	15.2708	14.7916
Acetylcysteine_1	NA	NA	11.5005	10.787	NA	NA	NA	12.8065	14.2417	12.7104	13.0656	12.6811	14.1635	10.4686	NA	NA	15.1299	NA	NA	11.5848	10.6237	NA	NA	13.5026	NA	13.2836	13.1906	14.0256	10.8972	11.1053	9.20316	NA	NA	13.9535	NA	NA	NA	NA	NA	NA	NA	23.1265	24.4078	23.9998	23.9605	23.2097	20.7676	24.5998	23.096
Tagatose	12.2644	12.9359	13.3643	12.3282	13.2654	11.2697	12.0323	11.5186	11.1433	11.3316	12.3029	12.5082	12.1441	12.9012	12.0163	12.8485	12.8896	11.4839	12.6523	12.4015	12.2864	12.5909	12.7656	12.4428	12.6722	12.5594	13.3735	12.8602	12.6111	13.7231	11.8421	12.693	12.6972	12.4425	12.2946	14.6894	13.0857	13.3813	13.1702	12.6495	12.7283	11.3061	12.4838	12.3426	12.8956	11.7051	11.7178	13.1822	11.5397
Ornithine	18.0136	17.0276	15.4522	16.5564	17.9311	14.2006	15.9559	16.0395	14.605	16.099	16.5045	17.0383	15.2561	17.2639	17.3618	17.8667	17.0498	16.3793	16.7088	16.7824	17.0168	16.9785	17.2615	17.5575	17.8966	17.4351	18.1822	17.7708	17.5442	19.4759	16.9481	17.646	17.5695	17.2771	16.8965	20.5061	18.272	18.3469	17.751	17.31	17.7267	14.6069	16.1408	16.9019	17.019	14.9028	13.5956	17.0712	16.2702
Fructose	16.081	15.909	15.2719	16.0705	15.705	15.3574	15.5054	15.7962	15.5934	15.433	15.4791	15.5182	15.518	15.6578	15.663	15.6207	15.4446	15.609	15.2585	15.4188	15.1821	15.259	15.5835	14.9025	14.8288	15.1603	14.866	14.7135	14.9547	14.2661	14.619	14.4054	14.3493	14.4664	14.4574	14.8376	14.6267	15.0612	14.8593	14.6643	14.5824	15.2625	15.3233	15.2661	15.1508	15.2336	14.7695	15.4008	15.1821
C6H12O6 [Sorbose|Tagatose]	17.9775	16.9522	16.3445	18.0395	15.1281	15.2338	13.4718	14.8673	13.8949	16.7172	12.7166	14.6121	14.3384	16.7889	14.8037	12.8594	16.2882	13.5912	14.0318	13.3762	NA	14.7722	14.7733	13.7312	13.493	17.2457	14.7099	NA	14.698	11.3116	NA	13.4961	11.4176	12.4522	12.1269	11.2272	12.401	13.6042	15.1441	13.1418	10.971	17.5561	16.1936	15.8656	13.2458	14.3605	15.3443	14.809	14
Shikimate	14.8521	15.0789	15.4424	14.7666	14.3499	15.438	14.8522	14.9622	15.5124	14.9655	14.93	15.2494	14.9088	15.0079	14.9914	15.0436	14.9772	14.9501	14.7885	15.0201	14.8806	14.737	14.841	14.6927	14.4233	14.1706	14.5192	14.318	14.6963	14.0621	14.1022	13.8421	13.7056	13.6843	13.5293	13.6604	13.8034	13.9207	14.1554	13.3981	13.9134	14.9754	14.7579	14.7039	14.5873	15.4367	15.3275	14.3083	15.1587
Mannose	15.3258	15.8052	16.0622	15.3131	14.9991	15.9593	15.3773	15.6619	16.0761	15.5632	15.5378	15.78	15.4183	15.5543	15.5381	15.6345	15.5631	15.4355	15.3511	15.5583	15.3777	15.3271	15.3645	15.254	15.0252	14.7934	15.0627	14.9059	15.3244	14.4909	14.6621	14.4061	14.3318	14.2296	14.1081	14.3237	14.4582	14.598	14.7224	14.0197	14.5161	15.5436	15.3831	15.3383	15.1143	15.8708	15.9329	14.9396	15.7124
Talose	17.3145	17.3946	16.9367	17.5869	16.6093	16.8338	16.7779	17.0334	16.7435	17.335	16.5852	17.0833	16.816	17.3707	17.0498	16.6844	17.2631	16.3033	17.599	17.2663	17.2856	17.0826	17.3561	17.8108	17.0156	17.6593	17.2783	16.8201	17.5628	17.2493	17.2329	17.2368	17.1194	17.2954	17.3079	16.302	16.8214	16.9673	16.6828	16.603	16.5343	17.1576	17.1245	16.8976	16.3969	16.7801	16.816	16.7164	16.8224
Galactitol	16.4564	16.5813	16.1134	16.8339	15.8807	16.1102	16.0022	16.309	16.0504	16.5565	15.834	16.3281	16.0312	16.6118	16.299	16.0263	16.5476	15.7188	16.6	16.4714	16.5196	16.3207	16.5876	16.884	16.2602	16.8369	16.4276	16.1152	16.7635	16.3188	16.45	16.4205	16.3079	16.5187	16.5281	15.5142	16.0261	16.2552	16.0106	15.882	15.7576	16.2526	16.2216	16.1188	15.6088	15.8672	16.0635	15.8024	16.0139
Glucose	17.3138	17.4118	16.9539	17.6042	16.6265	16.8332	16.7773	17.0507	16.7607	17.3344	16.5846	17.0827	16.8154	17.3879	17.067	16.7016	17.2625	16.3027	17.5984	17.2836	17.285	17.0819	17.3555	17.8102	17.0329	17.6766	17.2955	16.8195	17.5622	17.2487	17.2502	17.254	17.1366	17.2947	17.3073	16.3014	16.8387	16.9667	16.6822	16.6023	16.5336	17.157	17.1239	16.9148	16.4141	16.7973	16.8333	16.7158	16.8396
Citrate	15.5599	13.5962	11.7647	13.684	14.2697	11.4682	12.2576	12.5608	12.0719	12.8198	13.4792	13.4703	12.5465	13.6542	13.2143	13.8435	13.9459	13.0738	13.0969	13.0021	13.7334	13.6844	13.9722	15.2205	14.1916	13.9614	14.2926	14.0017	13.79	14.715	12.4813	12.9129	12.9695	12.6907	12.3816	13.6991	12.2455	12.0251	11.8266	11.8373	11.7154	12.3279	12.424	13.3646	14.7293	12.0445	NA	13.4402	15.2012
Glutamine	12.4376	11.5712	11.6989	11.9952	12.4536	12.0676	12.2793	12.6714	12.6609	12.1699	12.3552	12.6272	12.4449	13.53	13.0443	13.3006	13.0545	12.4528	13.6533	13.9074	14.0342	14.0027	14.2044	14.2394	14.7344	14.9053	14.5948	14.5642	14.3771	14.1662	14.3475	14.7037	14.6425	14.6187	14.679	13.3747	13.3747	13.3747	13.1175	13.5597	13.1202	NA	NA	NA	NA	NA	NA	NA	NA
Citrulline	15.3452	14.4114	12.6629	14.7389	15.6432	12.6094	14.3882	14.241	NA	14.8765	15.3121	15.7031	13.5281	15.1713	14.6615	15.2586	15.6423	14.7285	14.8886	14.5503	15.6913	15.3733	15.6118	15.4844	15.3833	15.0815	15.8483	15.7814	15.7745	16.3032	13.3422	14.2944	14.3359	14.878	14.3046	15.4613	14.4286	14.1088	13.9048	13.9278	14.3997	14.385	15.1319	16.0096	16.0586	15.6576	13.8036	NA	NA
Tetradecanoate	18.1082	18.4649	18.3737	17.5778	17.6015	18.5172	17.8978	18.0558	18.2395	17.9715	17.68	17.9738	17.6376	17.9772	17.9178	18.4378	17.983	18.0095	17.5241	18.0367	18.1432	17.757	17.9077	17.8095	17.7334	17.1846	17.7845	17.5893	18.0317	18.4253	17.4134	16.888	17.4104	16.6189	17.0401	NA	17.0623	17.1624	17.0361	16.2602	17.2967	18.1016	17.7213	17.6973	17.5802	18.6216	19.1285	17.4134	18.4335
Lysine	19.1865	17.9223	14.426	18.1137	19.4295	14.6669	17.5539	17.5972	15.611	17.8182	18.1833	18.5754	16.5785	18.8606	18.1603	18.8186	18.6785	17.9365	18.1578	18.1553	18.6796	18.6702	18.8654	19.0059	19.5341	18.9235	19.6435	19.4533	19.1142	20.8536	17.4806	18.4014	18.5042	18.4556	18.1614	20.9422	18.7152	18.4053	17.7796	17.9689	18.1499	14.9706	17.4705	18.3789	18.5271	15.649	13.7679	18.6829	17.8684
Acetylcysteine	NA	10.589	12.1646	11.6329	10.7317	15.5518	10.6793	11.6685	13.0033	17.0871	17.8777	17.9973	12.0109	10.9619	10.1798	11.1788	17.3749	18.0809	12.5244	11.6281	16.8758	14.7202	15.3692	10.2375	10.3386	11.1929	10.6919	17.5062	15.5983	9.40245	9.57686	11.1549	9.22662	15.2697	14.4536	10.506	10.5342	15.1021	15.9127	15.089	16.1194	18.8034	19.744	20.4433	20.4543	19.283	17.1304	20.9623	18.79
myo-Inositol	16.2058	15.587	14.6718	15.8559	16.2749	14.3269	15.4298	15.4099	14.9993	15.3135	15.602	15.8876	15.2064	16.0338	15.6916	15.8961	15.614	15.5947	15.4142	15.5222	15.713	15.7388	15.6973	15.4641	15.9478	15.5805	15.8855	15.7305	15.7887	16.3159	15.0513	15.4036	15.3617	15.1284	15.1896	16.5696	15.6726	15.7714	15.2643	15.6005	15.2817	14.3784	15.0328	15.4808	15.6738	14.5758	13.6882	15.7645	15.1902
Tyrosine	19.5537	19.1747	18.6823	19.5267	19.5147	18.6311	19.0685	19.5092	19.1634	19.1799	19.2622	19.3326	19.0774	19.6211	19.5507	19.6163	19.2748	19.5927	19.3513	19.5518	19.4448	19.4963	19.7752	19.5721	19.6053	19.9498	19.6676	19.5874	19.6419	19.8606	19.9344	20.3226	20.2386	20.3267	20.33	20.6794	20.894	21.3241	20.5568	21.539	20.7742	18.5834	19.0538	19.1303	19.1054	18.9606	18.188	19.304	19.0505
Histidine	14.5702	10.6497	10.95	14.1013	15.0173	11.6063	NA	13.9592	12.7559	12.7579	13.1997	13.8493	12.782	14.5752	NA	14.1844	13.7974	14.3475	13.9386	14.3306	13.9429	14.8416	14.6853	14.2253	14.9008	15.3096	14.8852	15.2974	14.8823	15.3842	13.9219	15.3436	15.1318	15.1588	15.3357	16.8968	15.4455	15.872	15.525	16.2795	15.2181	12.2394	13.7746	14.0788	14.117	12.9245	11.3439	14.6731	10.3789
Adenine	17.2662	17.0833	17.1191	17.1772	16.8013	17.298	17.0314	17.1238	17.2296	17.1379	17.1401	17.1894	17.1253	17.2775	17.2631	17.2698	17.1038	16.4935	16.7906	17.2463	16.9066	16.8399	17.0379	16.3296	16.349	16.2697	16.277	16.3704	16.5253	12.1125	12.5493	11.465	10.9162	13.2838	12.0297	11.332	11.5492	11.3564	11.2865	10.6514	11.5359	16.9683	17.0583	16.9315	16.8989	17.0711	16.8234	17.0994	16.7843
Spermidine	12.5976	11.8955	10.9692	11.902	12.4244	11.726	12.0168	11.3318	11.5059	11.3568	11.7799	11.938	11.6692	11.9438	11.9208	12.2049	12.5743	10.9361	12.5104	12.3641	12.6206	12.8857	13.0169	12.9257	12.9116	13.3421	13.1965	13.1803	13.3163	13.8145	12.2044	11.8832	11.942	11.9297	11.6302	13.9034	13.0546	12.7701	12.3219	11.2293	12.3765	12.256	11.8628	12.0601	12.3331	12.5293	11.7237	12.0195	11.9683
Heptadecanoate	16.2958	16.7765	16.709	15.7843	15.5786	16.9056	16.3553	16.3022	16.5162	16.2938	16.191	16.3383	16.087	16.2186	16.2193	16.7862	16.3832	16.2663	15.9296	16.2215	16.5926	15.8636	16.0493	16.219	15.9213	15.3599	15.9584	15.6613	16.2464	16.4083	15.5546	14.8456	15.4888	14.7867	15.0502	14.991	15.0666	15.6211	15.4118	14.4831	15.4437	16.436	15.8849	15.7678	15.5525	16.8465	17.4213	15.5357	16.2315
Tryptophan	18.1598	16.7793	16.8813	18.1873	18.189	16.7131	17.6123	18.2084	17.7376	17.3368	17.654	17.7873	17.4622	17.9973	17.4509	17.9487	17.678	17.8545	17.6569	17.7526	17.8513	17.9522	18.1529	18.0673	18.242	18.6375	18.4498	18.0817	18.1651	17.999	17.9566	18.2533	18.3276	18.2297	18.1918	17.9522	18.3626	17.8537	17.5851	17.8447	17.8459	16.5914	16.9355	17.7043	17.5545	16.8339	15.9189	17.6522	16.3332
Saccharopine	13.0805	12.3446	11.8477	12.5075	13.2089	11.7262	12.3697	12.34	12.0585	11.9486	12.0889	12.554	11.3694	12.7332	11.9413	12.7266	12.3996	12.7202	12.272	11.989	12.7114	12.2517	12.1787	11.9193	12.1634	12.1147	11.9352	12.3543	11.9904	11.2486	10.3967	10.7955	10.5162	10.5945	10.3994	10.787	10.349	10.7715	10.3041	10.3794	9.5612	12.4182	12.3207	12.0568	12.5102	11.8865	11.5301	12.1202	12.5785
Trehalose	18.4181	17.0861	16.4867	17.4777	18.2969	16.2124	17.1852	17.2914	16.695	16.7426	17.2626	17.4197	16.6582	17.7681	17.1537	17.6228	17.3351	17.3584	16.7143	16.8006	17.1829	17.176	17.2433	16.8491	17.0497	17.1523	16.667	17.053	16.8637	15.7686	14.9559	15.3059	15.2046	15.4702	15.4269	14.7576	14.8443	15.1063	14.5448	14.6608	14.2133	16.5169	17.2125	17.0784	17.2774	16.6034	15.8213	17.31	16.9845
AMP (A[M|D|T]P)	NA	10.4842	10.9627	NA	10.5301	NA	NA	10.7666	10.8415	11.0021	NA	NA	10.6685	NA	NA	10.3958	10.5301	NA	10.8838	11.281	10.2786	11.7564	11.07	10.3711	10.8896	10.1969	11.105	NA	11.939	10.4348	10.5987	10.4918	10.0886	10.3464	9.51024	10.2622	11.271	10.3084	10.391	NA	10.6602	10.9501	10.5301	10.3504	10.4297	10.509	NA	NA	NA
[truncated: 26 more columns]
