# Supplementary material for: GC-TOF/MS-based metabolomics analysis to investigate the changes driven by N-Acetylcysteine in the plant-pathogen Xanthomonas citri subsp. citri
Source: Sci Rep. 2021 Jul 30;11:15558. doi: 10.1038/s41598-021-95113-4 (PMC8324833; doi:10.1038/s41598-021-95113-4)
Supplement: Supplementary file 2 — Supplementary Table 2. [file 41598_2021_95113_MOESM2_ESM.xlsx]

## Sheet: Supplementary Table S2
GC-TOF/MS-based metabolomics analysis to investigate the antimicrobial activity of N-Acetylcysteine in the plant-pathogen Xanthomonas citri subsp. citri
Simone Cristina Picchi, Mariana de Souza e Silva, Luiz Leonardo Saldanha, Henrique Ferreira Marco Aurélio Takita, Camila Caldana and Alessandra Alves de Souza
Principal Component Analysis loadings
Contribution value	0.46	0.26	0.1	0.05	0.03
	PC1	PC2	PC3	PC4	PC5
Lactate	-0.0376158	-0.0403254	0.033862	-0.0620065	0.0175275
Similar to Glycolate	-0.0266703	-0.0181889	0.139758	0.0212338	0.0960799
Alanine	-0.0569157	-0.00781747	-0.0434582	0.0469892	0.0133972
Similar to Acetoacetate	-0.0436898	0.103314	0.0104903	0.0103882	0.0330896
Valine	-0.043369	0.130053	0.024972	0.0338974	0.0444557
Glycerol	-0.13668	-0.388407	-0.0695878	0.141438	0.0987061
Leucine	-0.0636182	0.0433869	-0.0215584	0.0182659	0.0542219
Isoleucine	-0.0506806	0.0771005	0.00870301	0.0296307	0.0341047
Glycine	-0.0452423	0.261126	0.0229753	0.0329313	0.101723
Orthophosphate	-0.075191	0.0730729	-0.315731	-0.0570716	-0.0610412
Proline	-0.0688603	0.135964	0.0167111	0.0800484	0.0286694
Glycerate	-0.0308608	0.0239742	0.0716789	-0.0260058	0.126737
Benzoate	-0.00331088	-0.0647261	0.0466484	-0.0340714	-0.072196
Similar to Hydroxypyruvate	-0.00398285	-0.0979651	-0.127281	-0.142312	0.0316187
Serine	-0.0313645	-0.100091	-0.144537	-0.122062	0.040032
Succinate	-0.0194676	-0.0763349	0.0864664	-0.0398119	0.134021
Threonine	-0.0375846	0.0875958	-0.0257851	0.00394077	0.0678378
Nicotinate	-0.0445469	0.0422106	-0.0018945	-0.000705151	0.0876882
Uracil	0.00464957	0.155881	0.121975	-0.0525751	0.0821235
trans-4-Hydroxyproline	-0.0450408	0.43955	0.149272	0.132776	0.0477636
4-Aminobutanoate	-0.0402865	0.0578446	-0.0265903	0.0375699	0.103045
Aspartate	-0.0659414	0.0478948	-0.305653	-0.125455	0.0133155
Methionine	-0.0523764	0.102326	0.00452892	0.00376858	0.0623063
Cysteine	0.362321	-0.0509902	0.0325528	0.0805583	-0.276614
Arginine	-0.093127	0.0807314	-0.31478	0.0297298	-0.0535175
C5H10O5 [Xylose|Arabinose|Lyxose]	-0.0135578	0.103708	0.0557757	-0.0768576	-0.065645
5-Oxoproline	-0.061132	0.103324	-0.0379298	-0.0199181	0.122698
Glutamate	-0.0792022	0.124969	-0.21874	-0.025366	0.086405
Phenylalanine	-0.0510862	0.0695678	-0.0100473	0.0446413	0.0743107
Asparagine	-0.0650282	-0.104335	-0.185792	-0.0400117	0.00259742
Acetylcysteine_1	0.849239	0.0762611	-0.241052	0.16468	0.230624
Tagatose	-0.0126956	0.0754941	-0.100786	-0.0536908	0.0330474
Ornithine	-0.0306813	0.175668	-0.223329	-0.151877	-0.00925814
Fructose	-0.0414027	-0.062711	-0.0220411	0.0724253	0.0981211
C6H12O6 [Sorbose|Tagatose]	-0.0194654	-0.194348	-0.0446748	0.0611177	0.727249
Shikimate	0.0050751	-0.0913639	0.026938	-0.0338435	-0.0244317
Mannose	0.00306169	-0.0895483	0.0281098	-0.0273172	-0.0106036
Talose	-0.0995115	-0.0385929	-0.0128335	0.420831	0.0373304
Galactitol	-0.0863008	-0.0300009	-0.00396096	0.31237	0.0333747
Glucose	-0.100919	-0.0391257	-0.0108455	0.418056	0.0308608
Citrate	-0.0527999	-0.00246026	-0.249174	-0.00566103	-0.0679298
Glutamine	-0.0239729	0.0195484	-0.123816	0.506034	-0.26466
Citrulline	0.0256469	-0.00577479	-0.212181	-0.044265	-0.138127
Tetradecanoate	0.0237506	-0.0820874	0.0350824	-0.0495882	-0.112572
Lysine	-0.0789135	0.140495	-0.340054	0.00280787	-0.070698
myo-Inositol	-0.0428512	0.0397039	-0.120829	-0.0146748	0.0312776
Tyrosine	-0.0262178	0.111333	-0.0118381	0.0477292	0.0789452
Histidine	-0.0393637	0.209468	-0.187445	-0.0393811	0.122111
Adenine	0.006789	-0.377064	-0.178553	-0.13648	-0.035929
Spermidine	-0.0191036	0.0299863	-0.0859895	0.121839	-0.116612
Heptadecanoate	0.015975	-0.0910883	0.0559961	-0.0499571	-0.107701
Tryptophan	-0.0536764	0.0609645	-0.0772797	0.0136129	0.0541664
Saccharopine	-0.0408684	-0.122908	-0.102187	0.0492436	0.0192859
Trehalose	-0.0854513	-0.152918	-0.16654	0.214295	0.0213854
AMP (A[M|D|T]P)	-0.0155977	-0.0428496	0.040265	0.0612532	-0.0897861
